# Supplementary material
Source: publisher figshare collection journal article supplement (https://springernature.figshare.com/ndownloader/files/22266387)
Supplement: Supplementary file 1 [file 22266387]

Transcription

# Excerpt 1

교과서를 거의 90% 사용한다고 봐야겠네요. 요즘 재구성 얘기도 나오고, 교과서 외에 것도 나오고, 교과서의 중요성이 점점 떨어지고 있긴 한데, 제가 교과서 외의 것을 갖다가 재구성해서 가르칠 정도의 깜냥은 아직 안 된다고 보기 때문에 아직은 교과서에 많이 기댑니다. (교사 2)

I think I use the textbooks in about 90% of my English class. Even though it is recommended to reorganise the curriculum and include the materials from outside of textbooks and also the importance of textbooks is being decreased these days, I still depend highly on textbooks because I think I’m not enough to reorganise the curriculum with the materials outside of textbooks. (Teacher 2)

# Excerpt 2

우리가 교과서가 없으면 처음부터 교육과정 자체를 교사가 짠다는 것에 대해서 그것을 이해하거나 그것이 어떻게 100% 당연하게 용인되는 분위기도 아닐뿐더러, 그렇지만 교사가 교과서 없이 교육과정을 짜기에 시간적으로 어려운 측면도 있고, 다른 업무들도 많기 때문에 그래서 교사가 어떻게 보면 교과서에 의존할 수도 있고, … 여러 가지 요인들이 복합적으로 작용을 해서 교과서에 제한되는 수업을 하게 되는 것 같아요. 지금까지. 새로운 교육과정이 들어오면서 그런 분위기가 많이 바뀌는 것 같고, 저도 또한 교과서를 조금 더 벗어나고 싶다는 마음을 갖게 됐죠. (교사 8)

If we don’t have textbooks, it’s not socially allowed 100% for teachers to design the curriculum by themselves and teachers lack time to design the curriculum without textbooks and we have a lot of other paperwork so we depend on the textbooks... Many complicated factors affect us, which leads us to make classes limited to textbooks. As a new national curriculum was implemented, that kind of atmosphere seems to have changed a lot and I also began to aspire to get a little more away from textbooks. (Teacher 8)

# Excerpt 3

제가 원하는 이상향은 학생들이 성적으로써의 영어가 아니라 실제 영어의 4 skill이 제일 중요하다고 생각하거든요. 그 4 skill을 잘 할 수 있도록 진정한 영어실력을 향상시켜주는 데 도움을 줄 수 있는 선생님이라고 생각합니다. … 저도 아직 많이 부족한 교사고 외국어라는 특성이 공부해도 공부해도 끝이 없잖아요. 그래서 제가 좀 더 공부를 하고 해야죠. 그런 것들이 가끔 자신감이 없을 수 있겠지만, 특히 speaking의 경우 많이 영어샘이 그럴 거 같은데, 가르칠 때 가끔 내가 내가 지금 맞게 말을 하고 있는건가? 이런 생각이 들 때 있거든요. 그게 사실 4 skill만 봤을 때 제일 큰 거 같아요. (교사 3)

I guess that the four skills of practical English are the most important rather than English for academic scores. The ideal English teacher is to help improve practical English skills to be good at the four skills…... I’m a very deficient teacher and it’s never-ending to study a foreign language in terms of its nature. So I should study more. That sometimes makes me unsure (of my English skills). In particular, this is applied to many English teachers, in the speaking part, when I teach speaking, I sometimes think, ”Am I speaking in the right way?”. That’s the most challenging part of the four skills. (Teacher 3)

# Excerpt 4

가르치는 것은 가르치는 내용에 맞게 가르칠 수 있는데, 평가가 상대적으로 이루어지다 보니까, 또 다른 반과 같이 들어가는 동료선생님하고 평가기준을 맞춰야 한다는 점에서 굉장히 제한적이에요. 내가 가르치는 반은 내가 가르친 걸 베이스로 해서 평가할 수 있었으면 정말 좋겠어. … 평가를 제한을 받게 되면, 평가에 맞춰서 수업도 제한을 받게 되죠. 내가 하고 싶은 거 못하게 되고, 더 풍부한 내용도 꾸리지 못하게 되죠. (교사 5)

I can teach according to the teaching contents but because I need to follow norm-referenced assessment and must make my assessment criteria consistent with fellow teachers teaching other classes in the same grade, it really limits my teaching. I wish I could assess my classes based on what I taught them... If the assessment is restricted, it is followed by the limit of teaching in class. I can’t teach what I want and bring richer materials into my English classes. (Teacher 5)

# Excerpt 5

재구성하는 게 사실 쉽진 않아요. 아까 말씀드린 대로 내가 한 학년을 오롯이 맡고 있으면 교육과정 재구성이 굉장히 쉬울 것 같애. 내 마음대로 하면 되니까. 교과서, 그거 쓰든 안 쓰든 내 마음대로 하면 되니까. 이렇게 큰 학교에서 3학년을 3명이 가르치거든요. 그니까 어쩔 수 없이 교과서를 바탕으로 해서 수업을 하고 교과서에서만 시험문제를 내야 하고, 선행학습 안 되고 당연히, 그건 내가 찬성하고, 근데 어쨌든 3명이 하려면 교과서 수업 밖에 안 되는 그런 게 있어서 슬프죠. (교사 6)

It’s not easy to reorganise the curriculum. As I told you before, if I take charge of one grade by myself, it would be easy to reorganise it because I can do it as I want... In this large school, three English teachers teach 3rd grade. So we can’t help having classes with textbooks, making questions only within textbooks, no prior learning, of course, I agree with that, anyway it’s sad that only textbook-oriented classes are possible with three English teachers in same grade. (Teacher 6)

# Excerpt 6

... 선생님들 협조 문제도 있죠. 생각도 다 다르고, 뭐 하나 해보려고 해도 혼자 못 움직이지 않아. 같은 학년에서 2, 3명씩 묶이게 되어 있는데 한 명만 안 움직여도 파토나는 거고. 비교되는 거는 굳이 그런 문제는 아닌데, 그래도 팀으로 움직여야 하기 때문에 뭔가 변화를 주기 어려운 측면이 많죠. 내 자신이 이상적으로 가려고 하는 그런 성향이 많지도 않은데, 옆에서 움직이지 않거나 나보다 더 심한 양반이 옆에 딱 앉아있으면 게임 아웃이여. (교사 10)

… There is the problem with teachers’ cooperation. We all think differently and if anyone wants to try something, the teacher can’t implement it by oneself. Because two or three teachers are tied in a grade, any teaching or assessment plan will not be realised if just one teacher doesn’t agree with it. I don’t care to be compared with other teachers, but it’s really difficult to make changes when working in a team. If any fellow teacher doesn’t move or any teacher next to me is less innovative than me, the game is over… (Teacher 10)

# Excerpt 7

아이들의 평가에 저도 모르게 많이 신경쓰는 거 같더라구요. 애들이 나 때문에 시험 못 쳤다 이런 얘기도 듣기 싫고, 아이들의 평가에 많이 신경쓰고 이러는 거 같더라구요. 학교진도도 다른 샘에 비해서 느리면 나중에 어떡하지? 작년보다는 진도를 천천히 나가도 되는 상황이라 괜찮기는 한데 진도에 대한 압박감도 있고, 동학년에 동교과샘이 3명이 있다보니까 진도를 맞춰야 한다는 압박감. 저 샘은 이렇게 해주시는데 우리는 왜 안 해주냐, 시험에 만약에 나왔는데 내가 말 안 하거면 어떡하냐, 이런 것도 있고, 다들 영어 시험, 고등학교 내신이 중요하니까 시험에 올인된 느낌. (교사 11)

I seem to pay a lot of attention to students’ assessment. I don’t want to hear that students ruined the exam because of me so I’m sensitive to their assessment. What should I do if my class progress is slower than other teachers’ classes? This year, it’s okay to progress with my class slower than last year but I’m pressured with the class progress and there are three English teachers in a grade so we’re pressured to make the class progress in consensus. Why does one teacher teach this but our teacher doesn’t teach it? What if that comes in the exam but I didn’t mention that? This kind of issue I have. Everyone seems to focus exclusively on the English exam because the high school records are important. (Teacher 11)

# Excerpt 8

저의 걱정은 처음에 정말 애들 영어실력향상, 영어라는 것이 어떤 것인지 느껴주고 싶은 마음, 해서 신규교사에서 거기서부터 시작했다가 많은 항의를 받고 점차 바뀌어왔죠. 결국에는 학부모들이 시비걸지 않는 수준, 학생들이 시비걸지 않는 수준에서의 평가와 수업을 설계했고, 실제로 그렇게 진행했죠. 많은 영향을 줬다고 볼 수 있죠. (교사 13)

At the beginning of my teaching career, all of my worries were to improve students’ English skills and to help them feel what English is about. I started at that point when I was a novice teacher but the goal has changed after facing lots of complaints. Lately, I have designed the assessment and class at a level where parents and students don’t complain and implemented them in that way. That [Parents’ and students’ responses] really affected them [the assessment and class]. (Teacher13)

# Excerpt 9

지금 여고에 간다면 내가 하고 싶은 수업을 할 수 있을 거 같은데, 과거에 여고에서의 수업은 어느 정도는 대학입시와 떨어져 생각할 수 없었기 때문에 좀 부담이 됐고 내가 하고 싶었던 수업을 마음껏 못 했던 거 같애. ... 반면에 지금 있는 학교에서는 그런 부담이 없으니까. 내가 하고 싶은 거 다 하니까, 정신적인 제한이 없다는 거. (교사 9)

If I work at a girls’ high school now, I could teach my class as I wish. But in the past, the English classes at the girls’ high school couldn’t be separated from KSAT, I felt quite burdened by it so I couldn’t teach as much as I wished…. On the other hand, I don’t have any burden at the present school. I do teach as I wish and don’t have any mental restriction. (Teacher 9)
